# Supplementary material
Source: Springer Nature journal article supplement (https://www.springermedizin.de/resource/supplementary/12969_2011_789_MOESM1_ESM.pdf/9593022)
Supplement: MOESM1 [file 9593022]

| United Nations<br>Major Area                  | Estimated PRs<br>(most are<br>part-time) | Population<br>Aged 0-14 years<br>(millions) | PR/Million Children | 1 PR:X Million<br>Children | <sup>†</sup> Physician<br>Density/Million<br>(Entire Population) |
|-----------------------------------------------|------------------------------------------|---------------------------------------------|---------------------|----------------------------|------------------------------------------------------------------|
| Africa                                        | 2                                        | 253                                         | 0.008               | 1:127                      | 217                                                              |
| Asia (includes the<br>Middle East [ME])       | Asia 40                                  | 1,041                                       | 0.04                | 1:26                       | 810                                                              |
|                                               | *ME only 20                              | 3                                           | 6.7                 | 1:0.15                     | 940                                                              |
| Europe                                        | 300                                      | 126                                         | 2.4                 | 1:0.42                     | 3,541                                                            |
| Latin America<br>(Central & South<br>America) |                                          |                                             |                     |                            | Central 1,080                                                    |
|                                               | 40                                       | 165                                         | 0.2                 | 1:4.1                      | South 2,930                                                      |
| Northern America                              | 265                                      | 67                                          | 3-4                 | 1:0.25                     | 2,210                                                            |
| Oceania                                       | 38                                       | 6                                           | 6.3                 | 1:0.16                     | 2,530                                                            |
| <b>Total</b>                                  | <b>645</b>                               | 1,658                                       | <b>0.4</b>          | <b>1:2.6</b>               | -                                                                |
| <b>Projected Need</b>                         | <b>5,600</b>                             | 1,658                                       | <b>2.1</b>          | <b>1:0.3</b>               | -                                                                |

\*Not included in the total of 645; Asia's data includes the ME.

<sup>†</sup>Total physicians of all types.
